# Supplementary material for: High efficiency green TADF emitters of acridine donor and triazine acceptor D–A–D structures
Source: Royal Society of Chemistry journal article supplement (doi:10.1039/c9tc02491c), 2019-01-01
Supplement: c9tc02491c1.pdf [file c9tc02491c1.pdf]

## Supporting information

# High efficiency green TADF emitters of acridine donor and triazine acceptor D-A-D structure

Ramanaskanda Braveenth<sup>†,1</sup>, Hyuna Lee<sup>‡,1</sup>, Sohyeon Kim<sup>†</sup>, Kanthasamy Raagulan<sup>†</sup>, Sunghoon Kim<sup>†</sup>, Jang Hyuk Kwon<sup>‡,\*</sup> and Kyu Yun Chai<sup>†,\*</sup>

<sup>†</sup> Division of Bio-Nanochemistry, College of Natural Sciences, Wonkwang University, Iksan City, Chonbuk, 570-749, Republic of Korea. \*E-mail: geuyoon@wonkwang.ac.kr;

<sup>‡</sup> Department of Information Display, Kyung Hee University, Dongdaemoon-gu, Seoul 130-701, Republic of Korea. \*E-mail: jhkwon@khu.ac.kr

\* Corresponding Authors: Email: jhkwon@khu.ac.kr; Tel.: +82-2-961-0948; Fax: +82-2-961-9154 (J.H. Kwon), Email: geuyoon@wonkwang.ac.kr; Tel.: +82-63-850-6230; Fax: +82-63-841-4893 (K.Y. Chai).

<sup>1</sup>These authors contributed equally to this work

## List of figures and tables

|                                                                                                                                                                                                                                                                                                |   |
|------------------------------------------------------------------------------------------------------------------------------------------------------------------------------------------------------------------------------------------------------------------------------------------------|---|
| FIGURE S1. <sup>1</sup> H NMR SPECTRA OF TRZ-DDPAC. ....                                                                                                                                                                                                                                       | 2 |
| FIGURE S2. <sup>13</sup> C NMR SPECTRA OF TRZ-DDPAC. ....                                                                                                                                                                                                                                      | 3 |
| FIGURE S3. <sup>1</sup> H NMR SPECTRA OF TRZ-DDMAC. ....                                                                                                                                                                                                                                       | 3 |
| FIGURE S4. <sup>13</sup> C NMR SPECTRA OF TRZ-DDPAC. ....                                                                                                                                                                                                                                      | 4 |
| <b>FIGURE S5.</b> DIFFERENTIAL SCANNING CALORIMETRY (DSC) AND THERMO GRAVIMETRIC ANALYSIS OF BOTH TADF EMITTERS. ....                                                                                                                                                                          | 4 |
| <b>FIGURE S6.</b> CYCLIC VOLTAMMETRY CURVE OF (A) TRZ-DDMAC, AND (B) TRZ-DDPAC. ....                                                                                                                                                                                                           | 5 |
| FIGURE S7. UV-VIS ABSORPTION AND PHOTOLUMINESCENCE SPECTRA (IN TOLUENE) OF (A) TRIAZINE, (B) DMAC, (C) DPAC, RESPECTIVELY. ....                                                                                                                                                                | 5 |
| FIGURE S8. SOLVATOCHROMIC EFFECT OF (A) TRZ-DDMAC AND (B) TRZ-DDPAC (C) DECREASING PHOTOLUMINESCENCE INTENSITY OF TRZ-DDMAC WITH RESPECT TO POLARITY OF SOLVENTS. ....                                                                                                                         | 6 |
| <b>FIGURE S9.</b> TRANSIENT PL DATA OF (A) TRZ-DDMAC AND (B) TRZ-DDPAC UNDER NITROGEN ATMOSPHERE. ....                                                                                                                                                                                         | 6 |
| FIGURE S10. OLED DEVICE STRUCTURES BASED ON TADF EMITTERS AND DIFFERENT HOST MATERIALS. ....                                                                                                                                                                                                   | 7 |
| FIGURE S11. (A) CURRENT DENSITY-VOLTAGE (J-V) AND LUMINESCENCE-VOLTAGE (L-V) CHARACTERISTICS, (B) EQE VERSUS LUMINANCE, (C) CURRENT EFFICIENCY VERSUS LUMINANCE, (D) POWER EFFICIENCY VERSUS LUMINANCE, (E) ELECTRO LUMINANCE (EL) SPECTRA OF 20WT% AND 30WT% OF TRZ-DDPAC DEVICES. ....       | 7 |
| FIGURE S12. (A) CURRENT DENSITY-VOLTAGE (J-V) AND LUMINESCENCE-VOLTAGE (L-V) CHARACTERISTICS, (B) EQE VERSUS LUMINANCE, (C) CURRENT EFFICIENCY VERSUS LUMINANCE, (D) POWER EFFICIENCY VERSUS LUMINANCE, (E) ELECTROLUMINANCE (EL) SPECTRA OF 10WT%, 20WT% AND 30WT% OF TRZ-DDMAC DEVICES. .... | 8 |



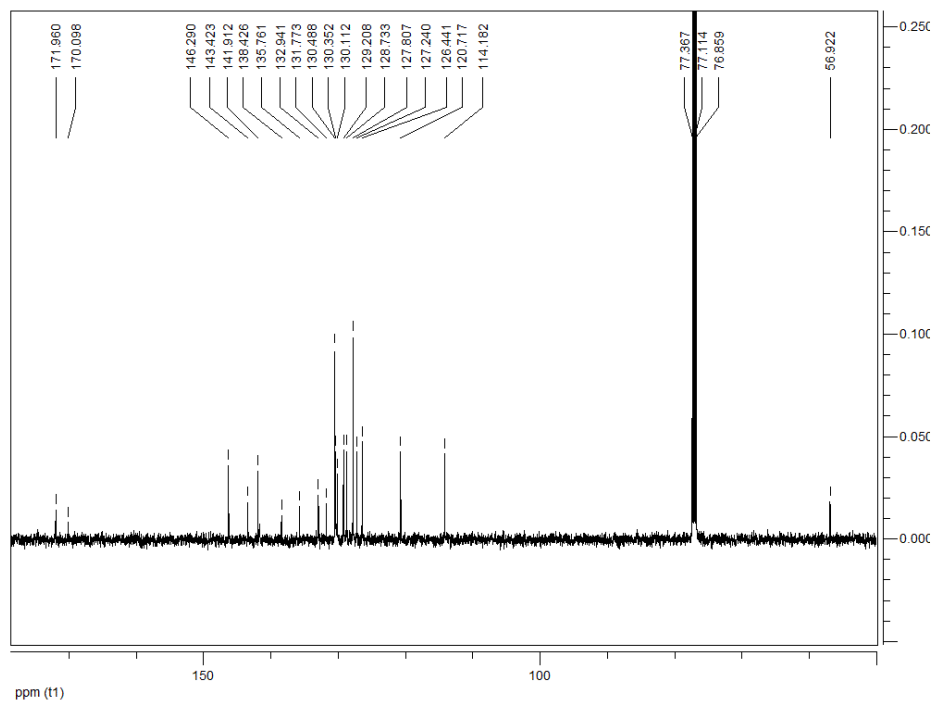

**Figure S2.**  $^{13}\text{C}$  NMR spectra of TRZ-DDPAc.

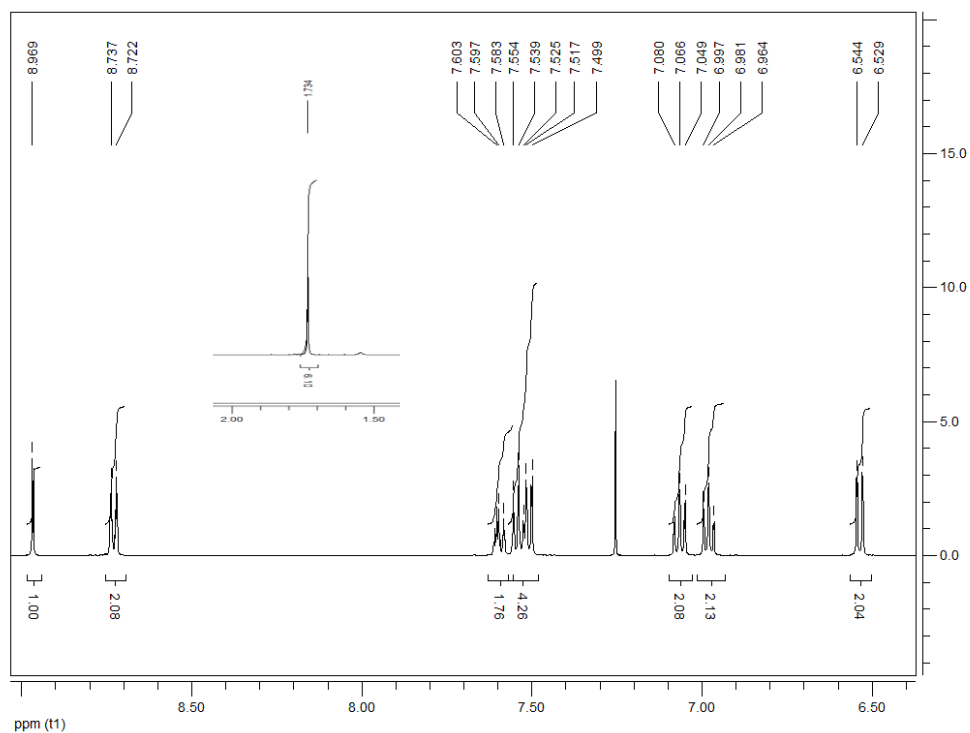

**Figure S3.**  $^1\text{H}$  NMR spectra of TRZ-DDMAc.

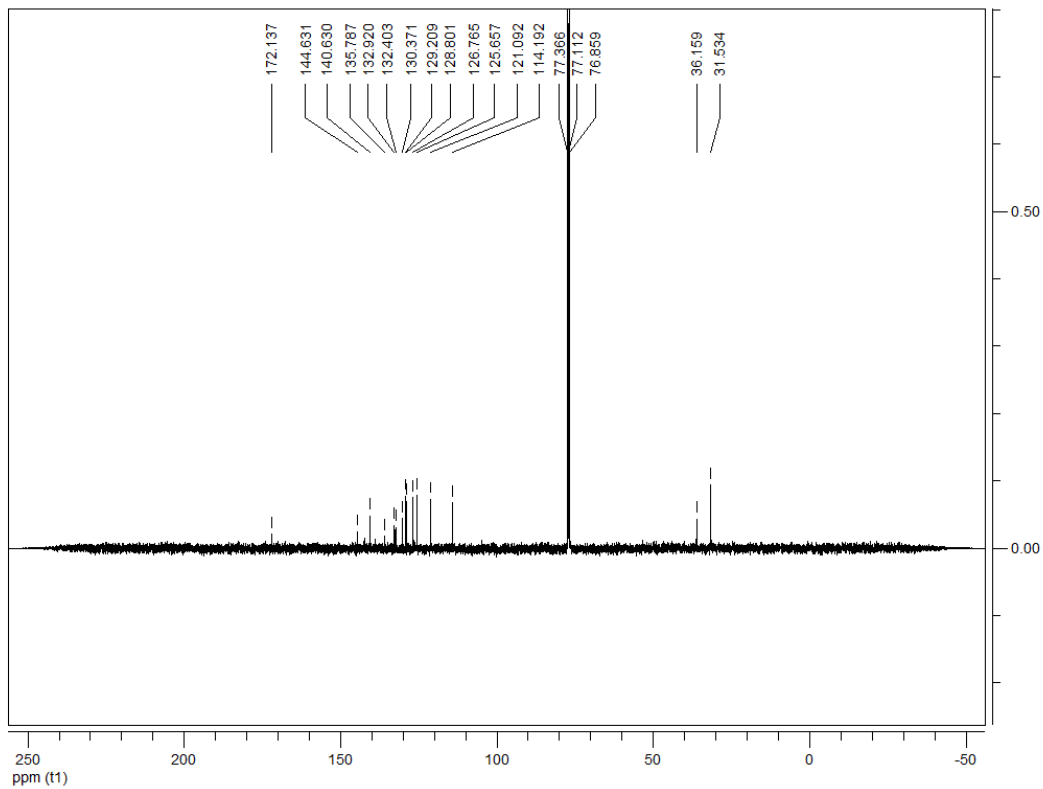

**Figure S4.**  $^{13}\text{C}$  NMR spectra of TRZ-DDPAc.

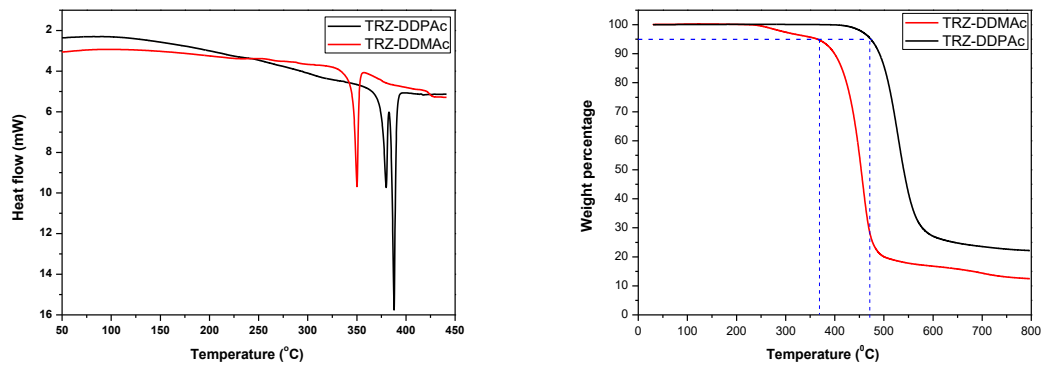

**Figure S5.** Differential scanning calorimetry (DSC) and thermo gravimetric analysis of both TADF emitters.

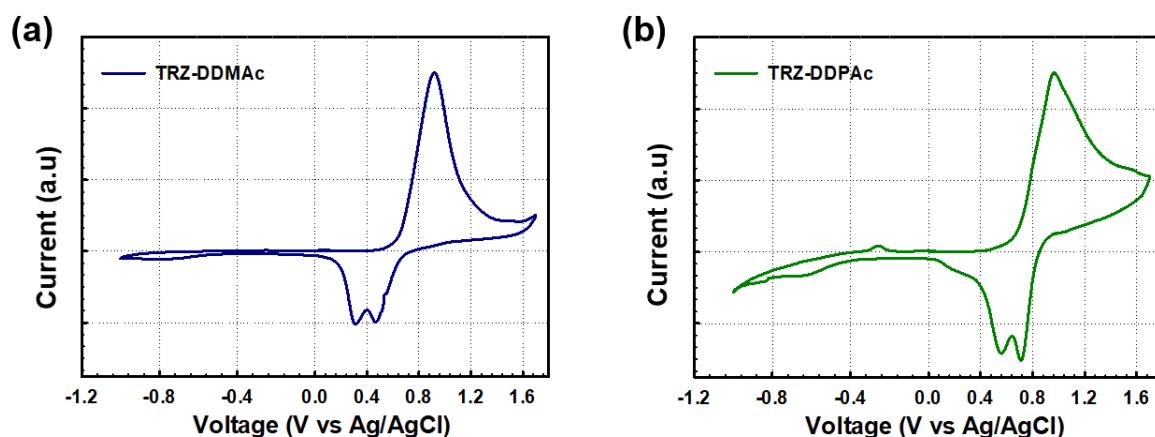

**Figure S6.** Cyclic voltammetry curve of (a) TRZ-DDMAc, and (b) TRZ-DDPAc.

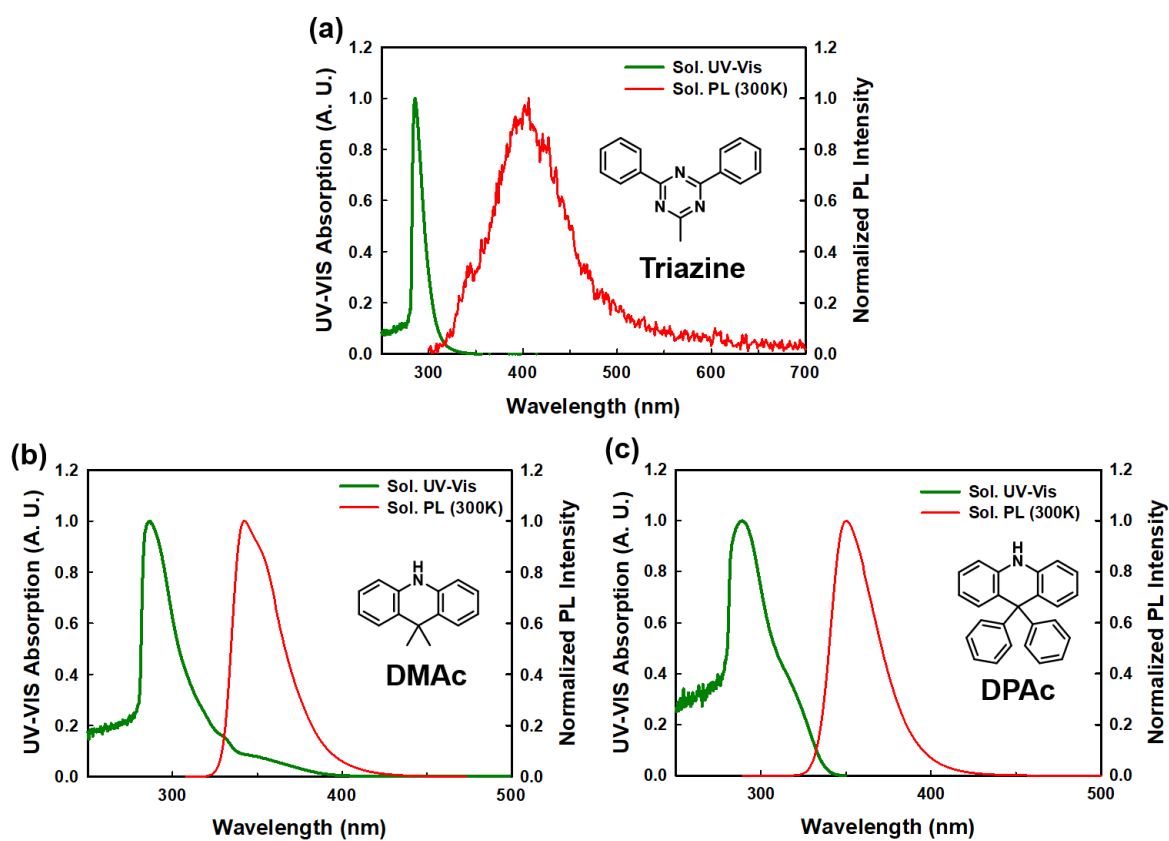

**Figure S7.** UV-vis absorption and photoluminescence spectra (in Toluene) of (a) triazine, (b) DMAc, (c) DPAC, respectively.

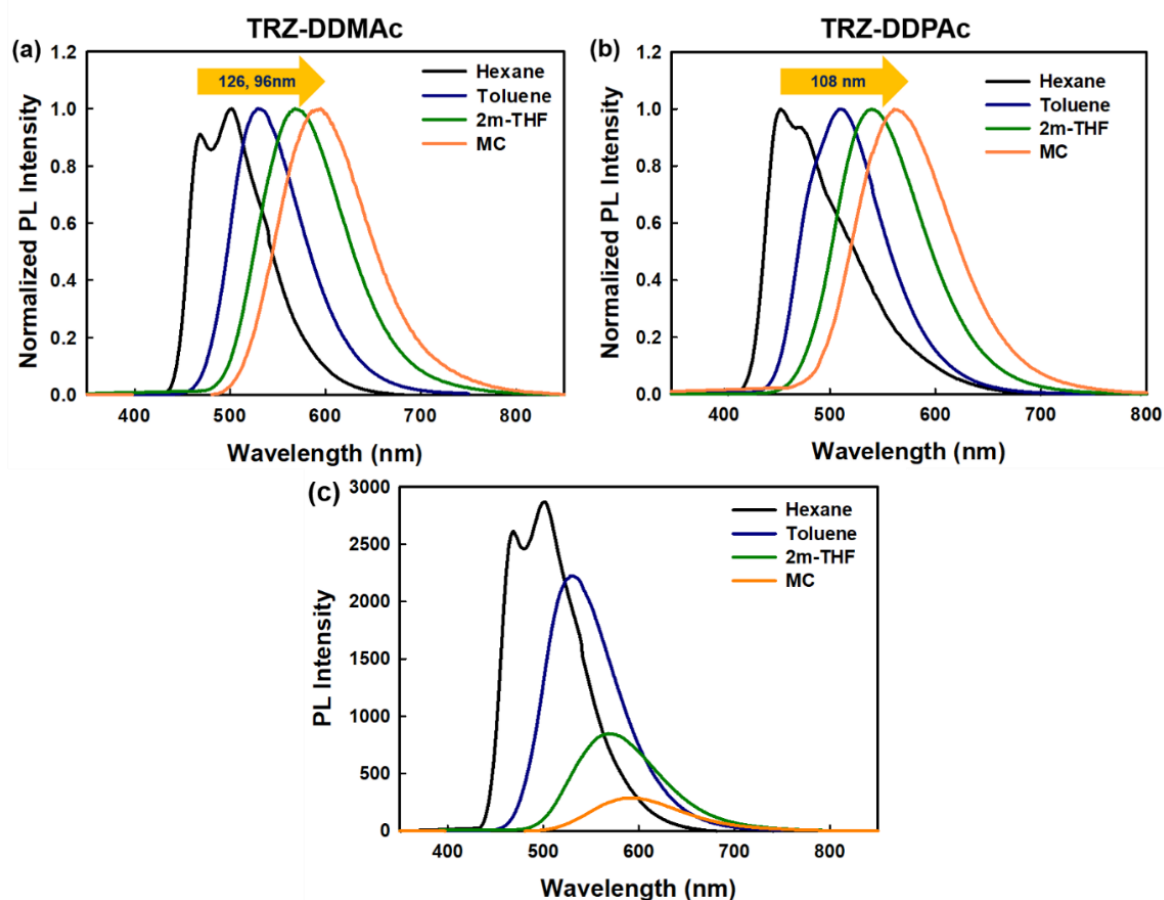

**Figure S8.** Solvatochromic effect of (a) TRZ-DDMAc and (b) TRZ-DDPac (c) decreasing photoluminescence intensity of TRZ-DDMAc with respect to polarity of solvents.

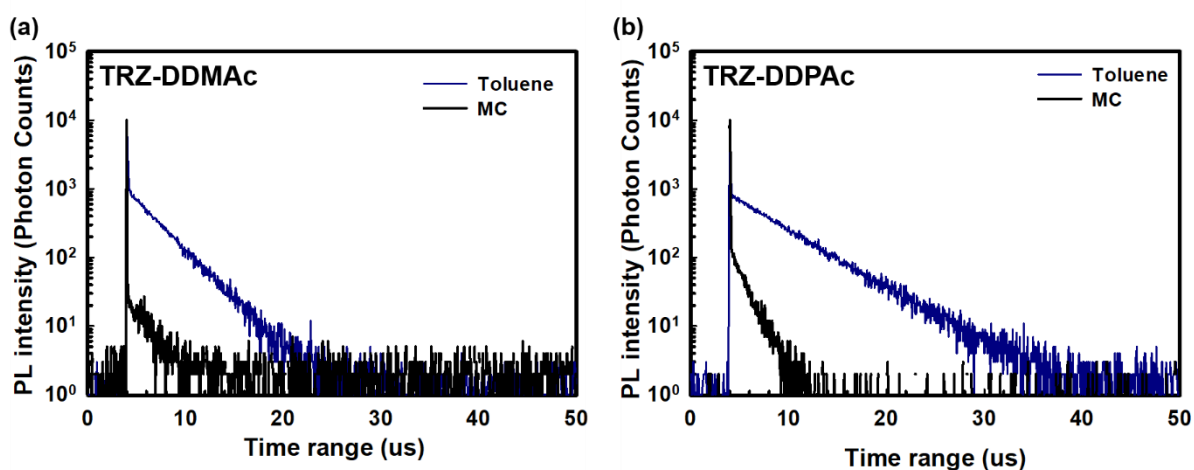

**Figure S9.** Transient PL data of (a) TRZ-DDMAc and (b) TRZ-DDPac under nitrogen atmosphere.

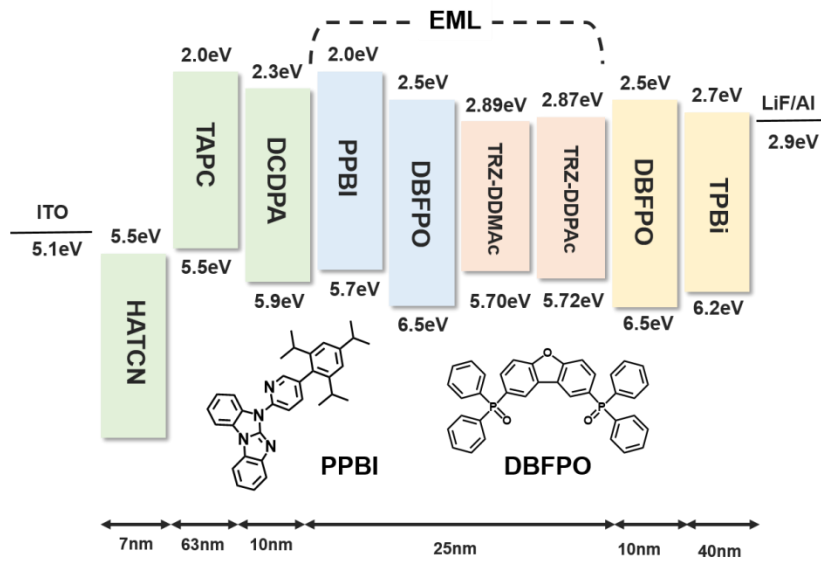

**Figure S10.** OLED device structures based on TADF emitters and different host materials.

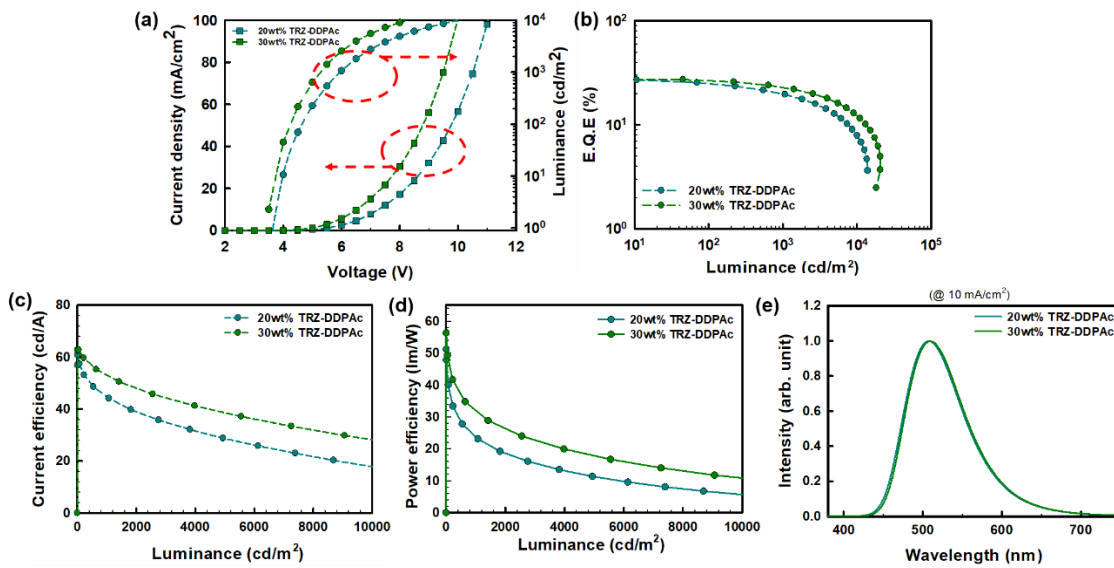

**Figure S11.** (a) Current density-voltage (J-V) and luminescence-voltage (L-V) characteristics, (b) EQE versus luminance, (c) current efficiency versus luminance, (d) power efficiency versus luminance, (e) Electro luminescence (EL) spectra of 20wt% and 30wt% of TRZ-DDPAC devices.

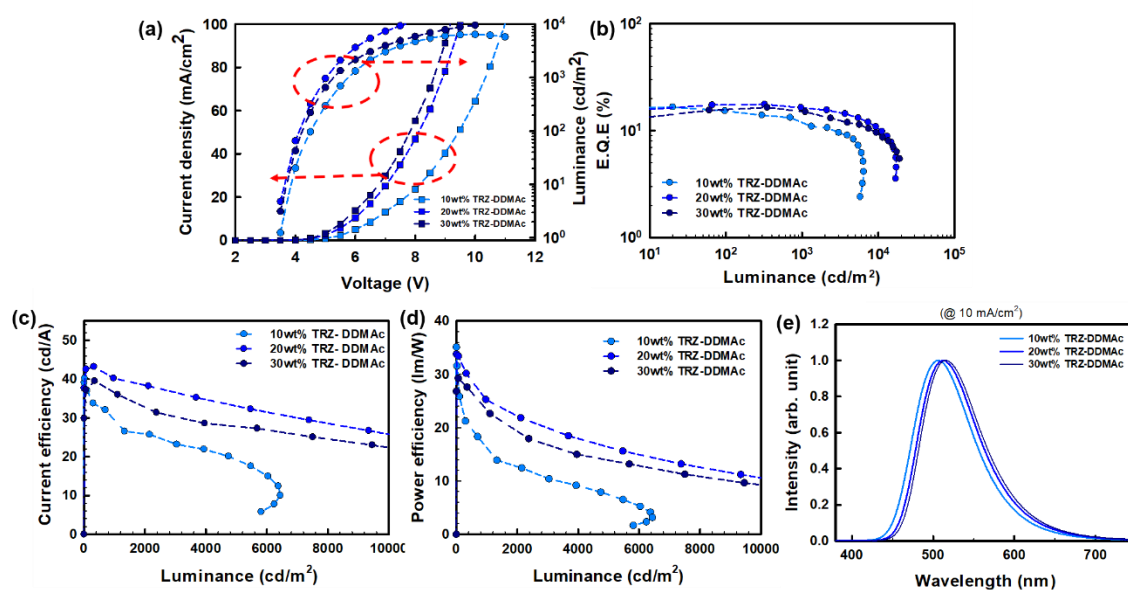

**Figure S12.** (a) Current density-voltage (J-V) and luminescence-voltage (L-V) characteristics, (b) EQE versus luminance, (c) current efficiency versus luminance, (d) power efficiency versus luminance, (e) Electroluminescence (EL) spectra of 10wt%, 20wt% and 30wt% of TRZ-DDMAc devices.

**Table S1.** The PLQY value of various doping concentration with DBFPO and PPBI hosts.

|           | 20wt% DBFPO | 20wt% PPBI |
|-----------|-------------|------------|
| TRZ-DDMAc | 47.95 %     | 52.73 %    |
|           | 30wt% DBFPO | 30wt% PPBI |
| TRZ-DDPAc | 79.67%      | 74.45%     |

**Table S2.** The calculated rate constant values of TRZ-DDMAc with reported method<sup>1</sup>.

| TADF emitter           | $\Phi_{\text{total}}^{\text{a}}$<br>(%) | $\Phi_{\text{p}}^{\text{b}}$<br>(%) | $\Phi_{\text{d}}^{\text{b}}$<br>(%) | $\tau_{\text{p}}^{\text{c}}$<br>(ns) | $T_{\text{d}}^{\text{c}}$<br>( $\mu\text{s}$ ) | $k_{\text{p}}^{\text{d}}$<br>( $\times 10^7$<br>$\text{s}^{-1}$ ) | $k_{\text{d}}^{\text{d}}$<br>( $\times 10^4$<br>$\text{s}^{-1}$ ) | $k_{\text{ISC}}^{\text{d}}$<br>( $\times 10^7$<br>$\text{s}^{-1}$ ) | $k_{\text{nr}}^{\text{Sd}}$<br>( $\times 10^5$<br>$\text{s}^{-1}$ ) |
|------------------------|-----------------------------------------|-------------------------------------|-------------------------------------|--------------------------------------|------------------------------------------------|-------------------------------------------------------------------|-------------------------------------------------------------------|---------------------------------------------------------------------|---------------------------------------------------------------------|
| TRZ-DDMAc <sup>e</sup> | 47.9                                    | 15.2                                | 32.7                                | 38.9                                 | 8.01                                           | 2.57                                                              | 12.5                                                              | 1.76                                                                | 42.4                                                                |

<sup>a</sup>Absolute PLQYs measured doped film in the integral sphere, <sup>b</sup>The prompt or delayed portion of total PLQY under  $\text{N}_2$  atmosphere, <sup>c</sup>The prompt and delayed exciton lifetimes of each molecule in doped films at 300 K under  $\text{N}_2$  atmosphere, <sup>d</sup>The rate constants of the prompt fluorescence decay, the delayed fluorescence decay, ISC, and non-radiative, <sup>e</sup>TRZ-DDMAc film was doped 20 % in DBFPO host.



**Table S3.** Prompt and delayed time of TADF emitters in different solvents.

| TADF emitters | Prompt (ns)<br>$\tau_p$ |      | Delayed (us)<br>$\tau_d$ |      |
|---------------|-------------------------|------|--------------------------|------|
|               | Tol                     | MC   | Tol                      | MC   |
| TRZ-DDMAc     | 56                      | 11   | 2.92                     | 1.79 |
| TRZ-DDPAc     | 39.2                    | 25.8 | 5.08                     | 1.29 |

**Table S4.** Device characteristics of TRZ-DDPAc with different doping concentration.

| Devices                 | Turn-on voltage at 1 cd/m <sup>2</sup> (V) | Driving voltage (V) | Current efficiency (cd/A)              | Power efficiency (lm/W)                | External quantum efficiency (%)        | (CIE color)               |
|-------------------------|--------------------------------------------|---------------------|----------------------------------------|----------------------------------------|----------------------------------------|---------------------------|
| DBFPO:<br>20% TRZ-DDPAc | 3.5                                        | 5.8 <sup>b</sup>    | 60.9 <sup>a</sup><br>45.2 <sup>b</sup> | 51.1 <sup>a</sup><br>23.7 <sup>b</sup> | 27.0 <sup>a</sup><br>201 <sup>b</sup>  | (0.24, 0.50) <sup>c</sup> |
| DBFPO:<br>30% TRZ-DDPAc | 3.2                                        | 5.3 <sup>b</sup>    | 62.8 <sup>a</sup><br>52.9 <sup>b</sup> | 56.3 <sup>a</sup><br>32.5 <sup>b</sup> | 27.3 <sup>a</sup><br>23.8 <sup>b</sup> | (0.25, 0.52) <sup>c</sup> |

<sup>a</sup>Maximum value, <sup>b</sup>Measured at 1000 cd/m<sup>2</sup>, <sup>c</sup>Measured at 10 mA/cm<sup>2</sup>.

**Table S5.** Device characteristics of TRZ-DDMAc with different doping concentration.

| Devices                 | Turn-on voltage at 1 cd/m <sup>2</sup> (V) | Driving voltage (V) | Current efficiency (cd/A)              | Power efficiency (lm/W)                | External quantum efficiency (%)        | (CIE color)               |
|-------------------------|--------------------------------------------|---------------------|----------------------------------------|----------------------------------------|----------------------------------------|---------------------------|
| PPBI :<br>10% TRZ-DDMAc | 3.4                                        | 5.7 <sup>b</sup>    | 40.2 <sup>a</sup><br>30.0 <sup>b</sup> | 35.1 <sup>a</sup><br>16.3 <sup>b</sup> | 16.6 <sup>a</sup><br>12.3 <sup>b</sup> | (0.24, 0.50) <sup>c</sup> |
| PPBI :<br>20% TRZ-DDMAc | 3.2                                        | 5.0 <sup>b</sup>    | 43.2 <sup>a</sup><br>41.0 <sup>b</sup> | 33.7 <sup>a</sup><br>25.2 <sup>b</sup> | 17.6 <sup>a</sup><br>16.4 <sup>b</sup> | (0.26 0.54) <sup>c</sup>  |
| PPBI :<br>30% TRZ-DDMAc | 3.1                                        | 4.9 <sup>b</sup>    | 39.5 <sup>a</sup><br>36.0 <sup>b</sup> | 29.3 <sup>a</sup><br>23.4 <sup>b</sup> | 16.5 <sup>a</sup><br>15.1 <sup>b</sup> | (0.28 0.56) <sup>c</sup>  |

<sup>a</sup>Maximum value, <sup>b</sup>Measured at 1000 cd/m<sup>2</sup>, <sup>c</sup>Measured at 10 mA/cm<sup>2</sup>.

## Reference

1. K.-C. Pan, S.-W. Li, Y.-Y. Ho, Y.-J. shiu, W.-L. Tsai, M. Jiao, W.-K. Lee, C.-C. Wu, C.-L. Chung, T. Chatterjee, Y.-S. Li, K.-T. Wong, H. C. Hu, C.-C. Chen and M.-T. Lee, *Advanced Functional Materials*, 2016, 26, 7560-7571.
